# Supplementary material
Source: publisher figshare collection journal article supplement (https://acs.figshare.com/ndownloader/files/5030077)
Supplement: Supplementary file 1 [file 5030077]

## Supporting Information

### Wafer-Scale and Wrinkle-free Epitaxial Growth of Single-Orientated Multi-layer Hexagonal Boron Nitride on Sapphire

*A-Rang Jang<sup>†, ‡, ⊥</sup>, Seokmo Hong<sup>†</sup>, Chohee Hyun<sup>‡</sup>, Seong In Yoon<sup>‡</sup>, Gwangwoo Kim<sup>‡</sup>, Hu Young Jeong<sup>§</sup>, Tae Joo Shin<sup>§</sup>, Sung O Park<sup>||</sup>, Kester Wong<sup>||</sup>, Sang Kyu Kwak<sup>¶, ||</sup>, Noejung Park<sup>¶, #</sup>, Kwangnam Yu<sup>▽</sup>, Eunjip Choi<sup>▽</sup>, Artem Mishchenko<sup>□</sup>, Freddie Withers<sup>□</sup>, Kostya S. Novoselov<sup>□</sup>, Hyunseob Lim<sup>†, ⊥, ¶, \*</sup>, and Hyeon Suk Shin<sup>†, ‡, ⊥, ¶, \*</sup>*

<sup>†</sup>Department of Chemistry, Ulsan National Institute of Science and Technology (UNIST), UNIST-gil 50, Ulsan 44919, Republic of Korea

<sup>‡</sup>Department of Energy Engineering, Ulsan National Institute of Science and Technology (UNIST), UNIST-gil 50, Ulsan 44919, Republic of Korea

<sup>⊥</sup>Low Dimensional Carbon Materials, Ulsan National Institute of Science and Technology (UNIST), UNIST-gil 50, Ulsan 44919, Republic of Korea

<sup>¶</sup>Center for Multidimensional Carbon Materials, Institute of Basic Science, Ulsan 44919, Republic of Korea

<sup>§</sup>UNIST Central Research Facilities (UCRF), Ulsan National Institute of Science and Technology (UNIST), UNIST-gil 50, Ulsan 44919, Republic of Korea

<sup>#</sup>Department of Physics, Ulsan National Institute of Science and Technology (UNIST), UNIST-gil 50, Ulsan 44919, Republic of Korea

<sup>||</sup> School of Energy and Chemical Engineering, Ulsan National Institute of Science and Technology (UNIST), UNIST-gil 50, Ulsan 44919, Republic of Korea

<sup>▽</sup>Department of Physics, University of Seoul, Seoul 02504, Republic of Korea

<sup>□</sup>School of Physics and Astronomy, University of Manchester, Manchester M13 9PL, UK

\*Email: [shin@unist.ac.kr](mailto:shin@unist.ac.kr) (HSS) and [hslim@ibs.re.kr](mailto:hslim@ibs.re.kr) (HL)

## EXPERIMENTAL METHODS

**Growth of multi-layer h-BN on sapphire substrate using LPCVD.** h-BN was prepared by a LPCVD method. A sapphire substrate (c-plane) was placed in the middle of a 2-inch alumina tube CVD system, and ammonia borane (97% purity, Sigma-Aldrich) was placed in a sub-chamber. The furnace was heated to 1400 °C under flow of Ar gas (10 sccm) and H<sub>2</sub> gas (10 sccm). The temperature, 1400 °C, was measured at the surface of the alumina tube where the thermocouple (TC 1) was placed. Separately, we measured the temperature inside a tube by inserting another thermocouple (TC 2) into the tube to compare with the temperature measured by TC1. The temperature difference between TC 1 and TC 2 was less than 10 °C. Therefore, we believe that the substrate temperature or the gas temperature would not be much different from the reaction temperature (by TC 1) that we described. The sub-chamber was heated to 130 °C for the decomposition of ammonia borane. The growth of multi-layer h-BN on sapphire substrate was initiated by opening a valve of the sub-chamber. After opening a valve of the sub-chamber, we supply the source during 30 min. During the growth, the pressure was maintained at 0.1 Torr. After growth completion, the furnace was cooled down to room temperature under Ar and H<sub>2</sub> gas.

**Characterization of *EM*-h-BN.** The surface morphology of *EM*-h-BN was characterized by atomic force microscopy (Dimension Icon, Bruker). Raman spectra were measured using a micro Raman spectrometer (alpha300, WITec GmbH) with a 532-nm laser. FTIR spectroscopy was performed on *EM*-h-BN, transferred *EM*-h-BN, and mechanically exfoliated h-BN in order to compare the quality of h-BN. *EM*-h-BN was transferred and h-BN was mechanically exfoliated onto lightly doped Si/SiO<sub>2</sub> substrates, which are transparent to IR.<sup>1</sup> The UV-visible absorption spectrum (Cary 5000 UV-vis-NIR, Agilent) was measured to estimate the optical band gap of *EM*-h-BN on the sapphire substrate. The optical band gap

energy was determined by using the formula of a direct band gap semiconductor:  $\alpha = C(E - E_g)^{1/2}/E$  (where  $\alpha$  is the absorption coefficient,  $C$  is a constant,  $E$  is the photon energy, and  $E_g$  is the optical bandgap energy). The plot of  $(\alpha E)^2$  vs.  $E$  should be a straight line. Therefore, when  $(\alpha E)^2 = 0$ ,  $E$  should be equal to  $E_g$ . X-ray photoelectron spectra (K-Alpha, Thermo Fisher) were measured to identify the B and N atoms of h-BN. Low voltage Cs aberration-corrected transmission electron microscopy (Titan Cube G2 60-300, FEI), operated at 80 kV with a monochromated electron beam, was used for ultra-high-resolution imaging of h-BN, along with selected area electron diffraction (SAED) and electron energy loss spectroscopy (EELS). *EM*-h-BN was loaded onto an ultra-high vacuum system ( $\sim 10^{-10}$  torr) in order to obtain low-energy electron diffraction (SPECTRALEED, Omicron NanoTechnology GmbH) patterns.

**Device fabrication and measurement.** The synthesized *EM*-h-BN was transferred onto 300 nm  $\text{SiO}_2/\text{Si}$  substrate using Al-etchant. We measured the breakdown voltage of our transferred *EM*-h-BN. The device size was  $1\mu\text{m} \times 1\mu\text{m}$  and the thickness of transferred *EM*-h-BN is about 1.3 nm. Figure R3a shows the tunneling current of transferred *EM*-h-BN is measured and the current level is similar with previous work.<sup>2</sup> The breakdown electric field of 7.8 – 9.2 MV/cm, as shown in Figure R3b. The CVD-grown polycrystalline graphene was transferred on the top of transferred *EM*-h-BN. The electrode pad for graphene FET was patterned through electron beam lithography process (NB3, NANOMEAM LTD), followed by the sequential deposition of titanium (5 nm) and gold (60 nm) using E-beam evaporator (FC-2000, Temescal). Graphene channels were patterned by electron beam lithography and etched by oxygen plasma. The electrical properties of fabricated graphene FETs were measured using vacuum probe station (CRX-4K, Lakeshore) with semiconductor characterization system (4200-SCS, Keithley).

Micro mechanically exfoliated graphene (MME-graphene) encapsulated between *EM*-h-BN and micro mechanically exfoliated hexagonal boron nitride (MME-h-BN) was produced in the following steps and can be seen schematically in Figure S9. Firstly, a MME-h-BN crystal was prepared on a PMMA membrane and used to lift a MME-graphene flake from a SiO<sub>2</sub> substrate using the van der Waals (vdW) forces between neighboring crystals. The MME-h-BN / MME-graphene stack was then brought into contact with the Al<sub>2</sub>O<sub>3</sub> / *EM*-hBN substrate encapsulating the MME-graphene between *EM*-h-BN and MME-h-BN. Top gate electrodes were firstly patterned using electron beam lithography followed by evaporation of 5nm Cr / 50 nm Au. This is followed by a second round of E-beam lithography to pattern the hall bar structure formed by the evaporation of 20 nm of Al to create the etch mask, Figure S9(b). A deep etch procedure in freon plasma was then performed to etch away MME-hBN, leaving a hall bar structure<sup>3</sup>. The Aluminum etch mask was washed away in MF319 developer and 1D Electrical contacts<sup>4</sup> were then attached to the graphene electrodes (5 nm Cr / 50 nm Au).

**Characterization of graphene on SiO<sub>2</sub> and h-BN substrate.** The adsorption peak at 200 nm of the h-BN film corresponds to its optical band gap, and the peak around 270 nm of graphene originates from the  $\pi$  plasmon peak. These results show that h-BN remains after the graphene transfer. The G and 2D peaks of suspended mechanical exfoliated graphene are located at 1581 and 2674 cm<sup>-1</sup>, respectively.<sup>5</sup> In this experiment, the G and 2D peaks of graphene on SiO<sub>2</sub>/Si substrate appear at 1586 and 2677 cm<sup>-1</sup>, while those of graphene on *EM*-h-BN at 1580 and 2668 cm<sup>-1</sup>, respectively. The peak positions for graphene on *EM*-h-BN are close to those for suspended graphene, indicating that *EM*-h-BN considerably suppresses the doping of graphene.

## MODELING AND SIMULATION DETAILS

**Model Structures and Computational Methods.** Classical molecular dynamics (MD), molecular mechanics (MM), and density functional theory (DFT) methods were used to investigate the interplay between binding energy and dynamic orientation of h-BN monolayer on the  $\alpha$ -Al<sub>2</sub>O<sub>3</sub>(0001) surface of the film model (i.e. thickness of 2.415 nm), in terms of rotational motion along the surface plane. Al-terminated Al<sub>2</sub>O<sub>3</sub>(0001) surface model was employed due to the relative surface stability, which was previously reported to be more stable than the O-terminated Al<sub>2</sub>O<sub>3</sub>(0001) surface <sup>6</sup>. For our *ab-initio* calculations, a vacuum slab of at least 20 Å was introduced along the perpendicular direction of the Al<sub>2</sub>O<sub>3</sub>(0001) surface plane, where all structures were optimized using the generalized gradient approximation (GGA) method as implemented in the Dmol<sup>3</sup> program <sup>7,8</sup>. A double numerical polarized (DNP4.4) basis set was used with the Perdew-Burke-Ernzerhof (PBE) exchange-correlation functional <sup>9</sup>. For the Brillouin zone integration, *k*-point mesh sizes of 3×3×2, 3×3×2 and 15×15×1 were used for the bulk  $\alpha$ -Al<sub>2</sub>O<sub>3</sub>, Al<sub>2</sub>O<sub>3</sub>(0001) surface and single layer h-BN, respectively. Dispersion correction accounting for the van der Waals interaction was implemented based on Grimme's DFT-D2 method <sup>10</sup>. A self-consistent field (SCF) convergence criteria was set to  $<1.0 \times 10^{-6}$  Ha. We used Mulliken charge to describe the electrostatic interaction between h-BN and Al<sub>2</sub>O<sub>3</sub>(0001), as shown by the calculated partial charges of the geometrically optimized structures; +0.616 *e* for boron and −0.616 *e* for nitrogen in h-BN, and +1.957 *e* for aluminum and −1.305 *e* for oxygen in bulk  $\alpha$ -Al<sub>2</sub>O<sub>3</sub>. For  $\alpha$ -Al<sub>2</sub>O<sub>3</sub>(0001), variable charges were assigned for each surface layer Al (+1.686*e*~+1.980*e*) and O (−1.310*e*~−1.200*e*) atoms. As partial charges were assigned to the (8×8×4) bulk  $\alpha$ -Al<sub>2</sub>O<sub>3</sub> and (16×16×1) single layer h-BN with 100 Å vacuum slab, the superstructures were then optimized by NPT-MD (i.e. isothermal-isobaric) method using the forcefields extracted from Zhao *et al.* <sup>11</sup> and Saha *et al.* <sup>12</sup> for Al<sub>2</sub>O<sub>3</sub> <sup>11</sup> and h-BN <sup>12</sup>, respectively. The lattice

parameters for the unit cells were found to be  $4.714 \times 4.714 \times 12.768 \text{ \AA}^3$  for bulk  $\alpha$ - $\text{Al}_2\text{O}_3(0001)$ , and  $2.450 \times 2.450 \text{ \AA}^2$  for h-BN. These parameters are in good agreement with previously reported values<sup>13, 14</sup>. MD simulation was run at 1 atm and 300 K for 50ps with the time step of 1fs. The results were collected from the last 20 ps run. To optimize h-BN/ $\text{Al}_2\text{O}_3$  structures, MM simulation was implemented with fitted forcefields<sup>11, 12</sup> and our calculated partial charges. The tolerance of energy, force, and displacement convergence were set to  $<2.0 \times 10^{-5} \text{ kcal/mol}$ ,  $<0.001 \text{ kcal/mol/\AA}$ , and  $<1.0 \times 10^{-5} \text{ \AA}$ , respectively. Additionally, we confirmed no bond formation between h-BN and  $\alpha$ - $\text{Al}_2\text{O}_3(0001)$  by the density of states (DOS) analysis. For each geometrically optimized Moiré pattern, the binding energy between the h-BN and the  $\text{Al}_2\text{O}_3(0001)$  surface was calculated as follows:

$$\Delta E_{\text{binding}} = E_{\text{total}} - E_{\text{h-BN}} - E_{\text{substrate}}$$

where  $E_{\text{total}}$  is the total energy of the optimized h-BN/ $\text{Al}_2\text{O}_3(0001)$ ,  $E_{\text{h-BN}}$  is the energy of h-BN in vacuum, and  $E_{\text{substrate}}$  is the energy of  $\text{Al}_2\text{O}_3(0001)$  substrate.

**Moiré Pattern calculation.** Moiré pattern was defined for specific h-BN rotation angle ( $\theta$ ), which is derived by pair indices ( $n, m$ ) in the following equation<sup>15, 16</sup>:

$$\cos(\theta) = \frac{n^2 + 4nm + m^2}{2(n^2 + nm + m^2)}$$

We used two base unit cells,  $R30^\circ$  and  $R90^\circ$ , as shown in Figure S8 to model the rotational-dependency of binding energy within  $0 - 120^\circ$  because the restricted orientation angle range for each base unit cell vector is  $0 - 60^\circ$  [10, 11]. The first unit cell model corresponds to  $(9 \times 9)$  h-BN with  $30^\circ$  rotation on  $(\frac{8}{3}\sqrt{3} \times \frac{8}{3}\sqrt{3}) \text{ \AA}^2$   $\text{Al}_2\text{O}_3(0001)$ , which was observed experimentally. The other model corresponds to the h-BN at  $90^\circ$  rotation that shares the same superstructure and geometry with the former system. Note that the  $30^\circ \leq \theta < 90^\circ$  systems are constructed

based on the first ( $R30^\circ$ ) model, whereas the  $90^\circ \leq \theta \leq 120^\circ$  and  $0^\circ \leq \theta < 30^\circ$  systems are based on the second ( $R90^\circ$ ) model. The cell parameters for both sets of models corresponding to each rotation angle are provided in Table S1.

**Simulation Results.** Binding energies of h-BN/ $\text{Al}_2\text{O}_3(0001)$  were described by non-bonding interaction composed of van der Waals (vdW) and electrostatic ( $ES$ ) interaction energies. We calculated the binding energy per boron-nitrogen atom pair at different rotational angles along the surface plane. At  $R30^\circ$  and  $R90^\circ$  rotational angles, h-BN adsorbed on  $\text{Al}_2\text{O}_3(0001)$  more strongly than at other orientation angles; adsorption was the strongest at  $R30^\circ$  as shown in Fig. 3d. The binding energy was predominantly influenced by the  $ES$  interaction rather than the vdW interaction.  $ES$  interaction contributions indicated that the  $R30^\circ$  and  $R90^\circ$  models were more stable than h-BN/ $\text{Al}_2\text{O}_3(0001)$  at other rotation angles. However, we note that the vdW interaction in the  $R90^\circ$  system was weaker than in the  $R30^\circ$  system because of the close proximity of h-BN on  $\text{Al}_2\text{O}_3(0001)$ . In Figure S8, these two structures are easily distinguishable by the h-BN atom positions located at 0.304 nm above the  $\alpha\text{-Al}_2\text{O}_3(0001)$  surface, where nitrogen atoms are located on top of the Al-terminated layer for  $R30^\circ$ , and boron atoms are on top of the surface O-layer for  $R90^\circ$ . The shortest interface distance between h-BN and  $\text{Al}_2\text{O}_3(0001)$  for  $R30^\circ$  and  $R90^\circ$  are 2.978 and 3.031 Å, respectively. This means that the atomic configurations of relatively adjacent h-BN to the surface at  $R90^\circ$  are less favourable than those in the  $R30^\circ$  system because of the repulsive vdW interactions between boron and oxygen atoms. By contrast,  $30^\circ$  rotated h-BN was the most strongly attracted to  $\text{Al}_2\text{O}_3(0001)$  surface by strong vdW and  $ES$  interactions.

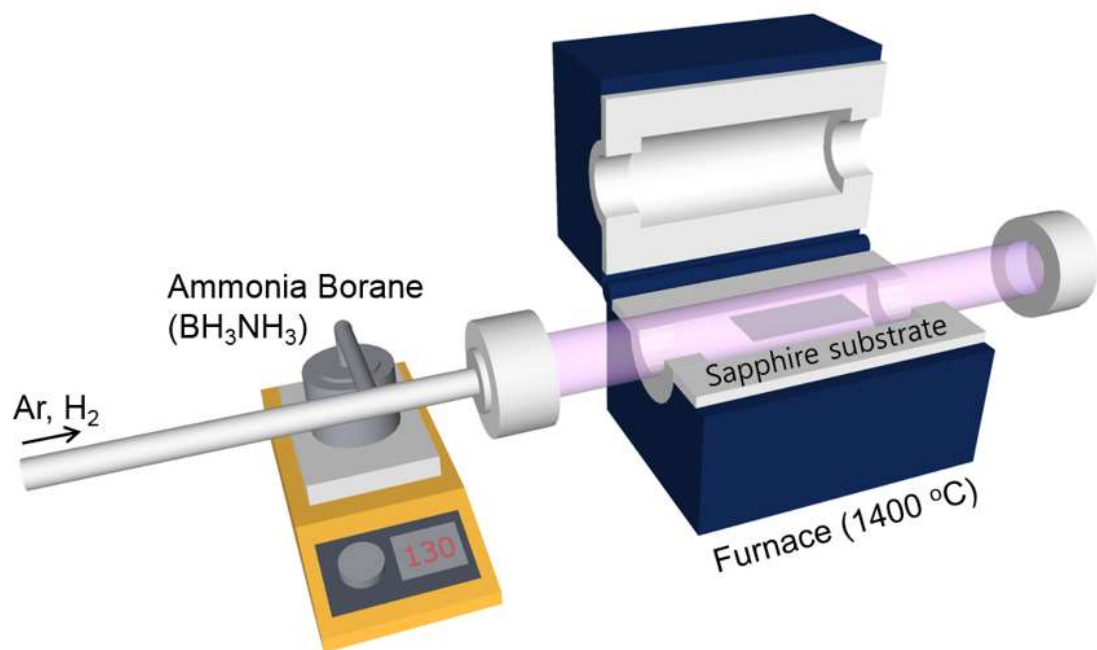

**Figure S1.** Schematic of the LPCVD system used for multi-layer h-BN growth on sapphire substrate.



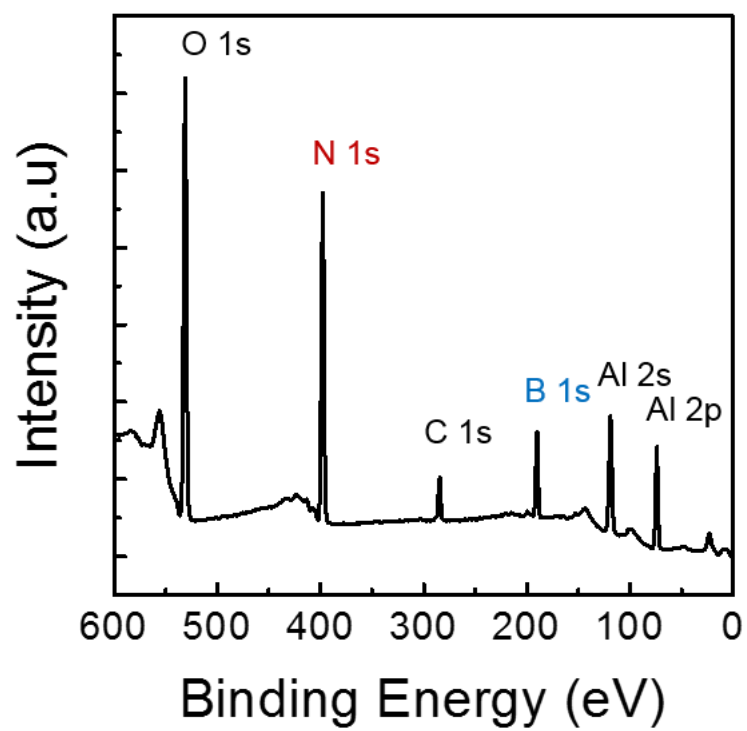

**Figure S2.** XPS survey spectra of *EM*-h-BN on sapphire substrate.

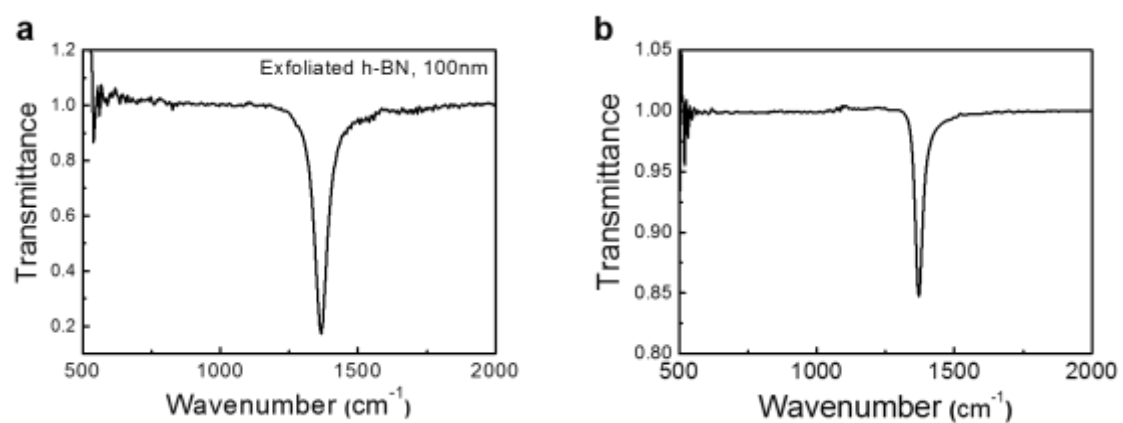

**Figure S3.** FTIR spectra of **(a)** mechanically exfoliated h-BN and **(b)** transferred *EM*-h-BN on  $\text{SiO}_2/\text{Si}$  substrate.

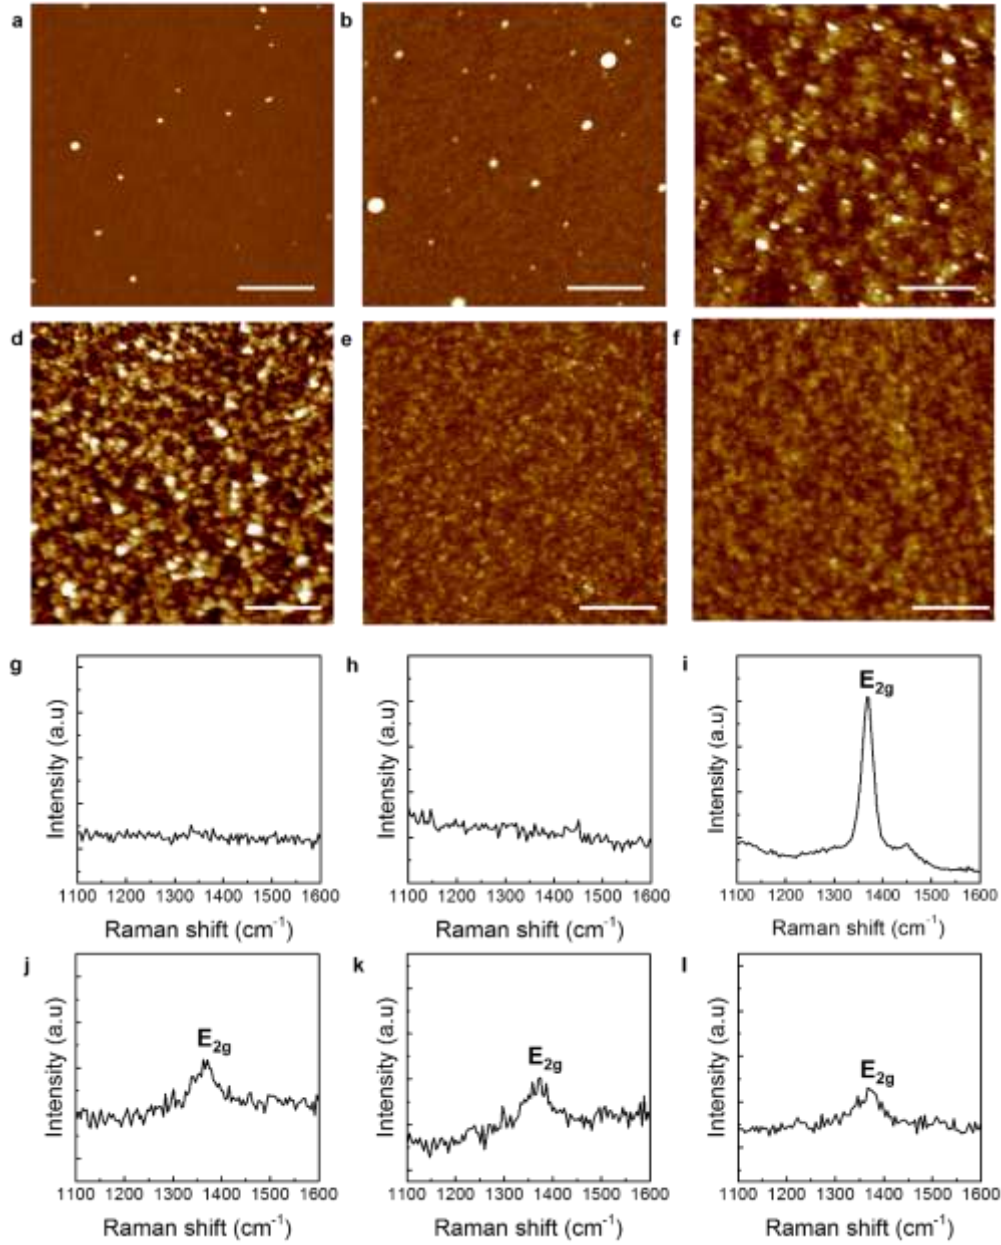

**Figure S4.** AFM images of **(a)** bare sapphire and **(b)** SiO<sub>2</sub>/Si substrates. AFM images of h-BN grown on SiO<sub>2</sub>/Si substrate at **(c)** 1100 °C, and h-BN grown on sapphire substrate at **(d)** 1100 °C, **(e)** 1200 °C, and **(f)** 1300 °C. Scale bar is 500 nm. Raman results of **(g)** bare sapphire and **(h)** SiO<sub>2</sub>/Si substrate. Raman results of h-BN grown on SiO<sub>2</sub>/Si substrate at **(i)** 1100 °C, and h-BN grown on sapphire substrate at **(j)** 1100 °C, **(k)** 1200 °C, and **(l)** 1300 °C.

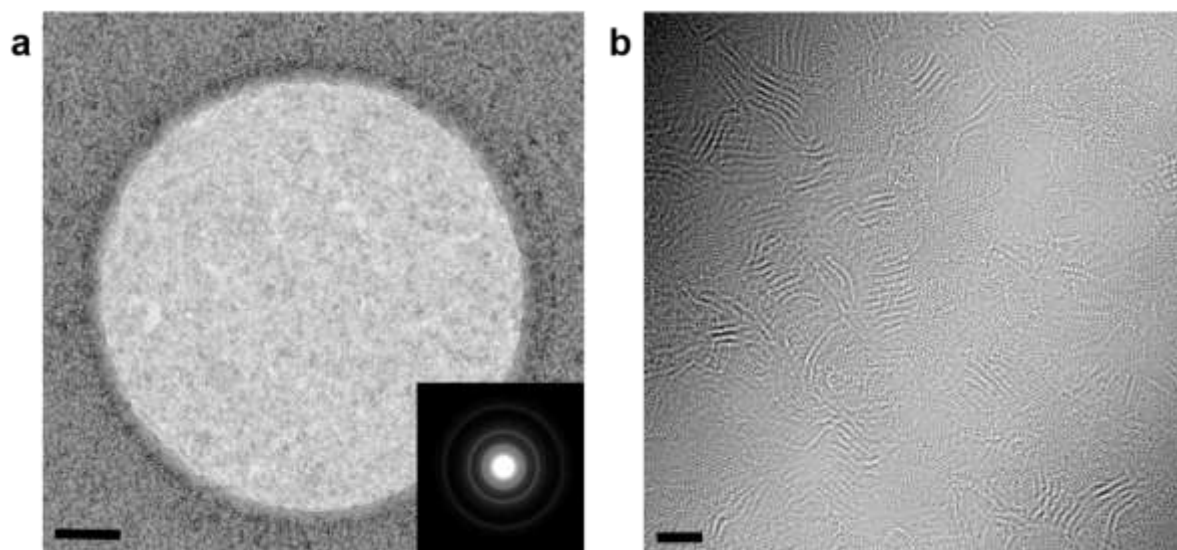

**Figure S5.** (a) Low-magnification (scale bar is 200 nm), diffraction pattern (insert), and (b) high-magnification TEM image of small h-BN particles grown on SiO<sub>2</sub>/Si substrate. (scale bar is 2 nm)

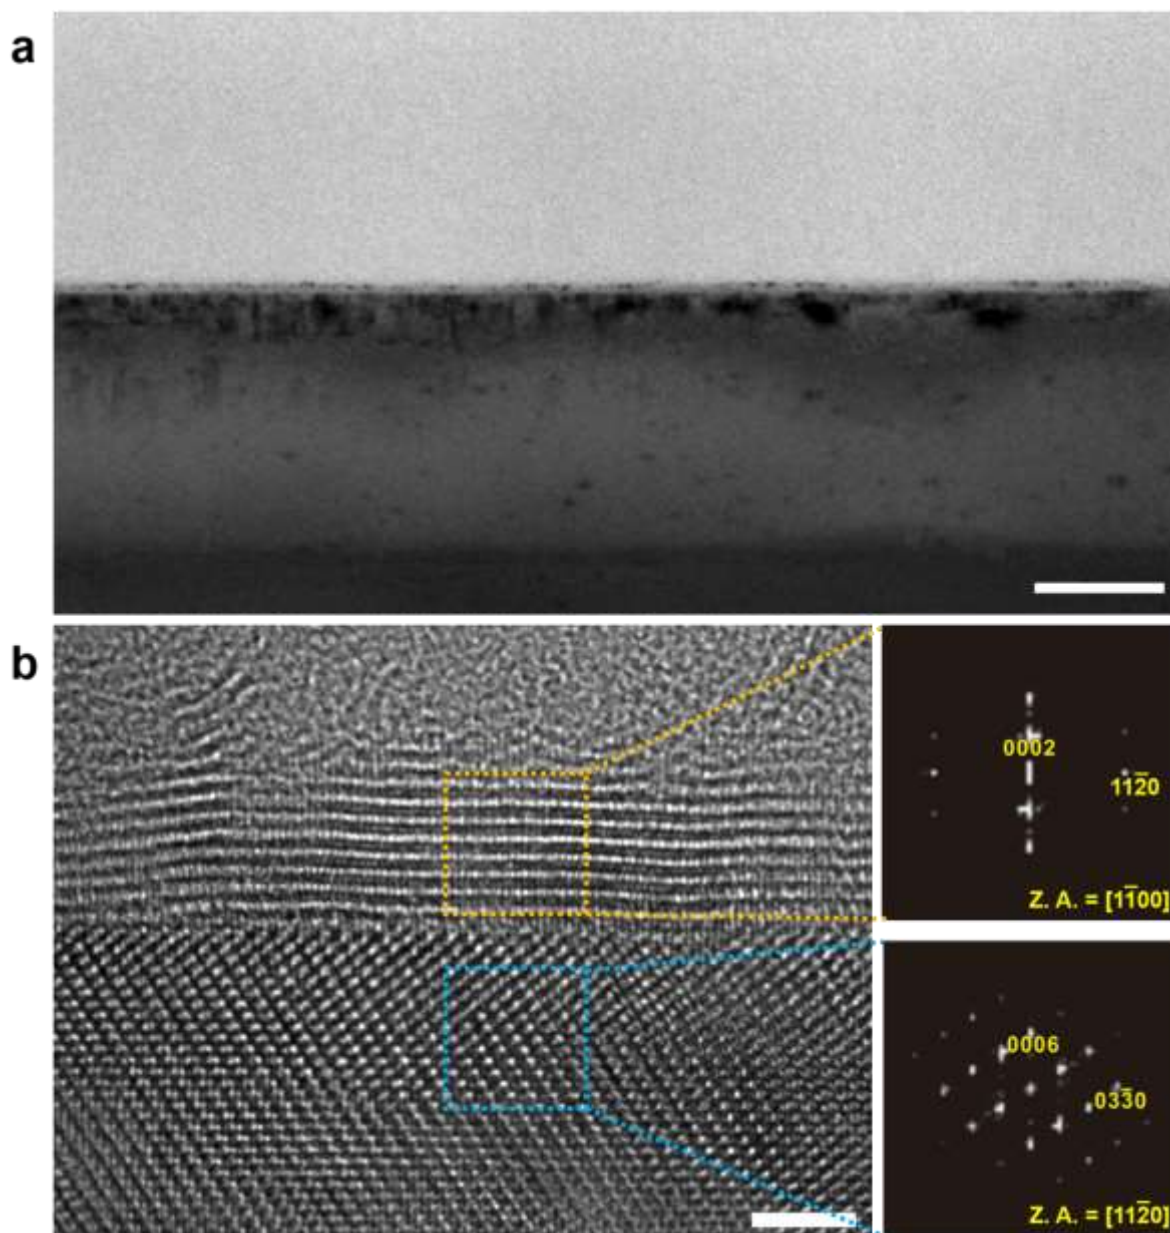

**Figure S6.** (a) Low-magnification TEM image of *EM*-h-BN on sapphire substrate. Scale bar is 50 nm. (b) Atomic resolution high-magnification TEM image and FFT patterns of *EM*-h-BN on sapphire substrate. Scale bar is 2 nm.

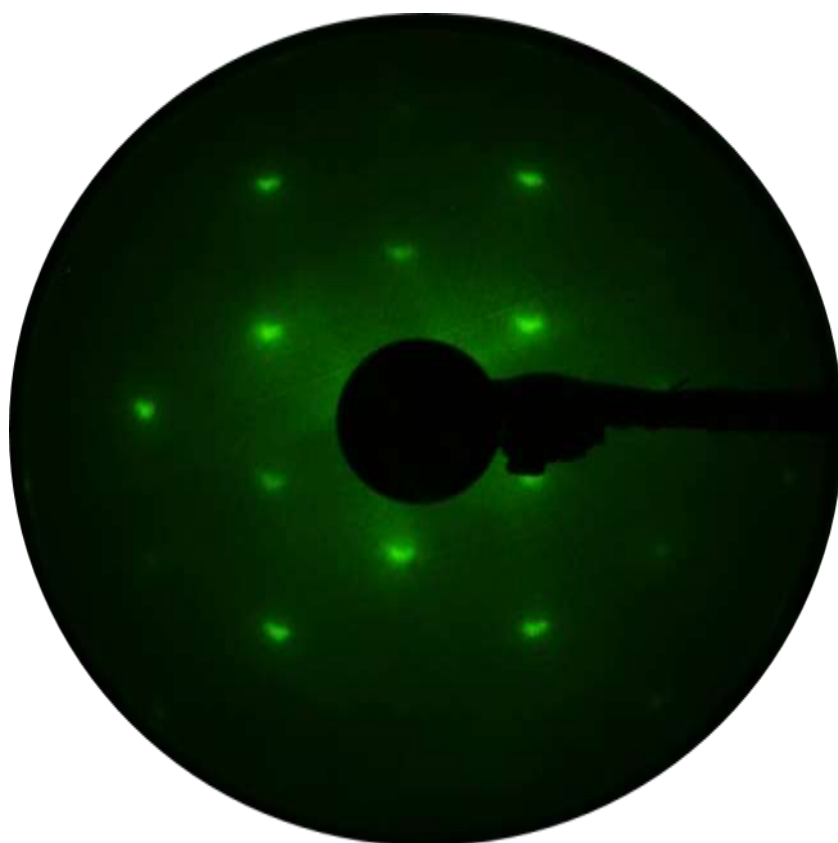

**Figure S7.** LEED pattern of bare sapphire substrate at 95 eV.

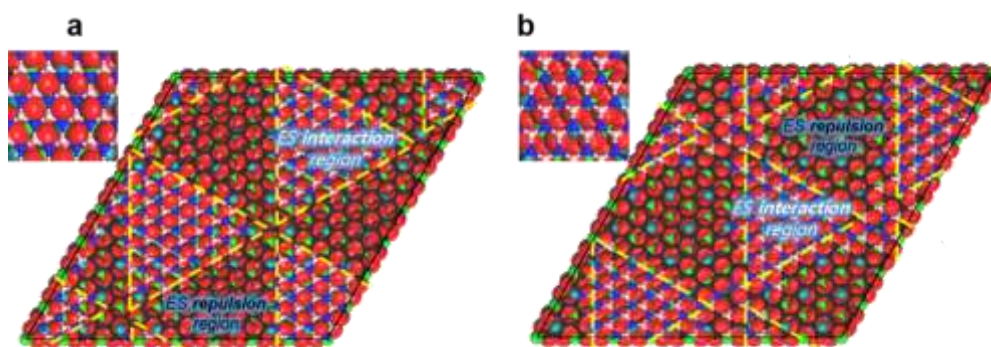

**Figure S8.** Base unit cells of (a)  $R30^\circ$ , and (b)  $R90^\circ$  configurations illustrated by Boron (salmon color) and nitrogen (blue color), which are located at 0.304 nm (i.e. in average height) from the  $\alpha\text{-Al}_2\text{O}_3$  surface. The rest of h-BN are colored in black. Ball-and-stick model was used for h-BN and CPK model was used for  $\alpha\text{-Al}_2\text{O}_3$ , where Al on the surface is blue-green, Al in the second layer is green, and oxygen is red.

**Table S1. Binding energy between h-BN and half Al-terminated  $\text{Al}_2\text{O}_3$ .** Data of cell parameters, studied Moiré structures, binding, van der Waals (vdW), and electrostatic (ES) energies between h-BN and  $\alpha\text{-Al}_2\text{O}_3(0001)$  with a vacuum of at least 70 Å (i.e. cell parameter  $c$  is 100 Å for all considered models). Superscript asterisk (\*) represents Moiré structures modeled by using based vectors of  $R90^\circ$ .

| Cell parameters |         | Rotation angle ( $\theta$ ) | Pair indices ( $n, m$ ) | Binding energy (kcal/mol) | vdW energy (kcal/mol) | ES energy (kcal/mol) |
|-----------------|---------|-----------------------------|-------------------------|---------------------------|-----------------------|----------------------|
| $a$ (Å)         | $b$ (Å) |                             |                         |                           |                       |                      |
| 138.251         | 138.251 | 2.204                       | (3, 1)*                 | -1.56907                  | -1.53977              | -0.02930             |
| 101.449         | 101.449 | 8.213                       | (1, 2)                  | -1.56900                  | -1.53987              | -0.02912             |
| 167.138         | 167.138 | 16.826                      | (2, 3)                  | -1.56960                  | -1.54011              | -0.02949             |
| 38.344          | 38.344  | 30                          | (1, 1)                  | -1.57735                  | -1.54036              | -0.03699             |
| 167.138         | 167.138 | 43.174                      | (3, 2)                  | -1.56944                  | -1.54000              | -0.02944             |
| 101.449         | 101.449 | 51.787                      | (2, 1)                  | -1.56874                  | -1.53971              | -0.02904             |
| 138.251         | 138.251 | 57.796                      | (1, 3)*                 | -1.56875                  | -1.53958              | -0.02916             |
| 138.251         | 138.251 | 62.204                      | (3, 1)                  | -1.56870                  | -1.53956              | -0.02914             |
| 101.449         | 101.449 | 68.213                      | (1, 2)*                 | -1.56852                  | -1.53959              | -0.02893             |
| 167.138         | 167.138 | 76.826                      | (2, 3)*                 | -1.56833                  | -1.53946              | -0.02887             |
| 38.344          | 38.344  | 90                          | (1, 1)*                 | -1.56964                  | -1.53759              | -0.03205             |
| 167.138         | 167.138 | 103.174                     | (3, 2)*                 | -1.56850                  | -1.53957              | -0.02893             |
| 101.449         | 101.449 | 111.787                     | (2, 1)*                 | -1.56878                  | -1.53976              | -0.02902             |
| 138.251         | 138.251 | 117.796                     | (1, 3)                  | -1.56903                  | -1.53975              | -0.02928             |

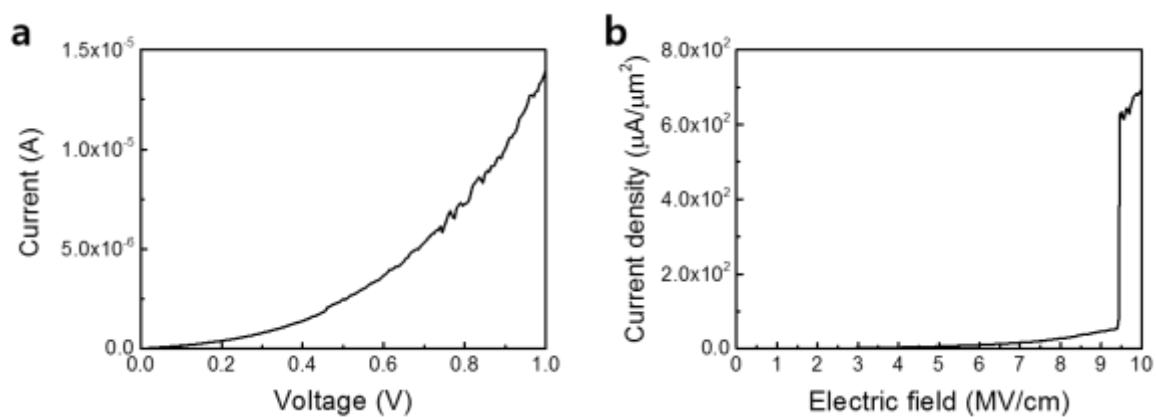

**Figure S9.** Characteristic I-V curves for Au/EM-h-BN/Au device. Representative (a) tunneling current and (b) breakdown voltage measurement in the transferred EM-h-BN.



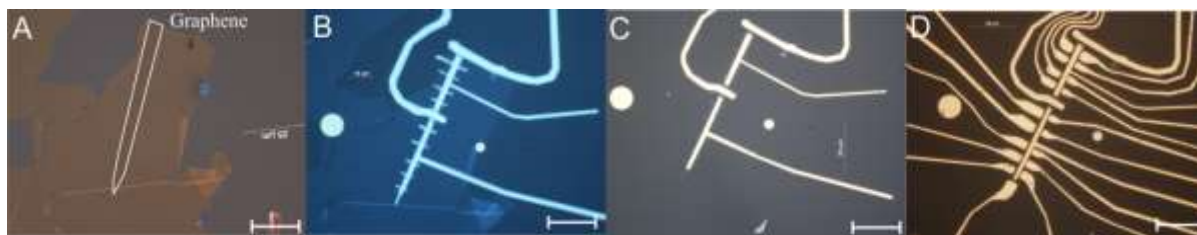

**Figure S10.** Schematic of the fabrication process for devices encapsulated with micro mechanically exfoliated h-BN (MME-h-BN) **(a)** mechanically exfoliated h-BN crystal used to lift exfoliated graphene from  $\text{SiO}_2$  substrate. **(b)** The  $\text{Al}_2\text{O}_3$  / *EM*-h-BN / MME graphene / MME-h-BN stack with added Au gate electrodes (50 nm) and Aluminum etch mask. **(c)** the structure after etching away MME-h-BN in a Freon plasma. **(d)** 1D contacts added to the MME-graphene encapsulated between *EM*-h-BN and MME-h-BN (Scale bar = 20  $\mu\text{m}$ ).

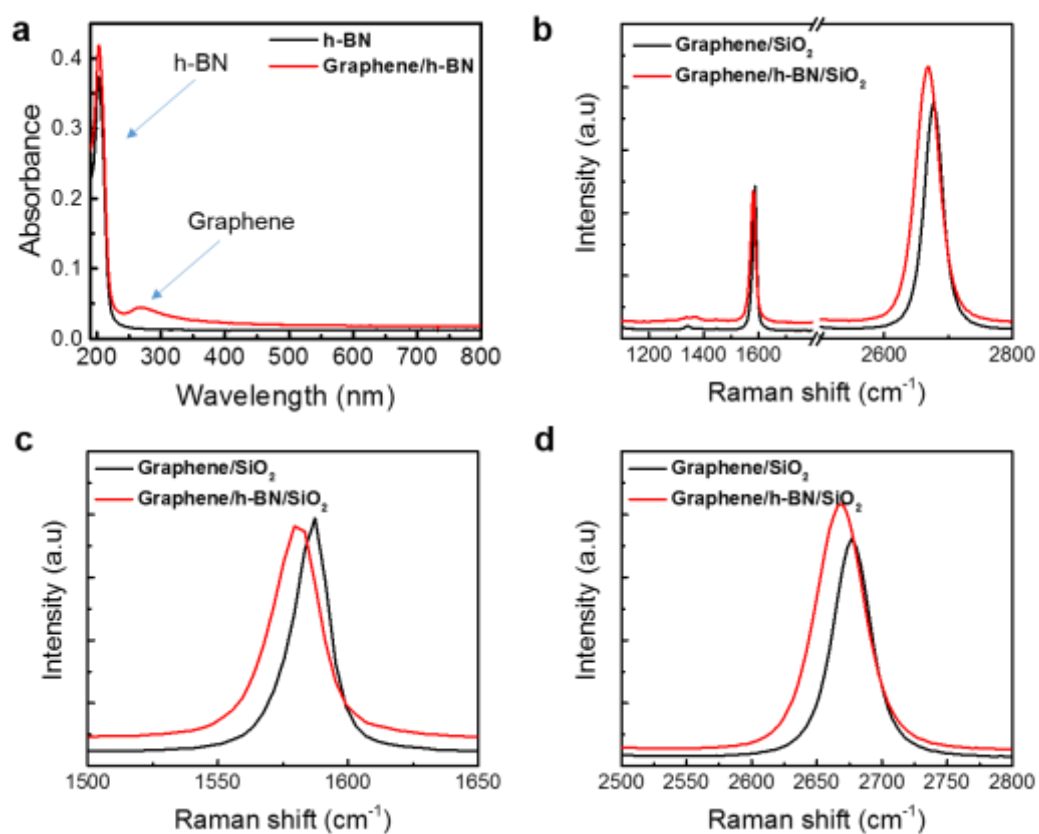

**Figure S11.** (a) UV-visible absorption and (b) Full range Raman spectrum of graphene on various substrates. (c) G peak, and (d) 2D peak position Raman spectra of graphene on various substrates.

## References

1. Novoselov, K. S.; Jiang, D.; Schedin, F.; Booth, T. J.; Khotkevich, V. V.; Morozov, S. V.; Geim, A. K. *Proc. Natl. Acad. Sci. U.S.A.* **2005**, *102*, 10451-3.
2. Britnell, L.; Gorbachev, R. V.; Jalil, R.; Belle, B. D.; Schedin, F.; Katsnelson, M. I.; Eaves, L.; Morozov, S. V.; Mayorov, A. S.; Peres, N. M. R., et al. *Nano Lett.* **2012**, *12*, 1707-1710.
3. Kretinin, A. V.; Cao, Y.; Tu, J. S.; Yu, G. L.; Jalil, R.; Novoselov, K. S.; Haigh, S. J.; Gholinia, A.; Mishchenko, A.; Lozada, M., et al. *Nano Lett* **2014**, *14*, 3270-3276.
4. Wang, L.; Meric, I.; Huang, P. Y.; Gao, Q.; Gao, Y.; Tran, H.; Taniguchi, T.; Watanabe, K.; Campos, L. M.; Muller, D. A., et al. *Science* **2013**, *342*, 614-617.
5. Berciaud, S.; Ryu, S.; Brus, L. E.; Heinz, T. F. *Nano Lett.* **2009**, *9*, 346-352.
6. Wang, X.-G.; Chaka, A.; Scheffler, M. *Phys. Rev. Lett.* **2000**, *84*, 3650-3653.
7. Delley, B. *J. Chem. Phys.* **1990**, *92*, 508-517.
8. Delley, B. *J. Chem. Phys.* **2000**, *113*, 7756-7764.
9. Perdew, J. P.; Burke, K.; Ernzerhof, M. *Phys. Rev. Lett.* **1996**, *77*, 3865-3868.
10. Grimme, S. *J. Comput. Chem.* **2006**, *27*, 1787-1799.
11. Zhao, L.; Liu, L.; Sun, H. *J. Phys. Chem. C* **2007**, *111*, 10610-10617.
12. Saha, S.; Gadagkar, V.; Maiti, P. K.; Muthu, D. V. S.; Golberg, D.; Tang, C.; Zhi, C.; Bando, Y.; Sood, A. K. *J. Nanosci. Nanotechnol.* **2007**, *7*, 1810-1814.
13. MUNRO, M. *J. Am. Ceram. Soc.* **1997**, *80*, 1919-1928.
14. Ji, C.; Levitas, V. I.; Zhu, H.; Chaudhuri, J.; Marathe, A.; Ma, Y. *Proc. Natl. Acad. Sci. U.S.A.* **2012**, *109*, 19108-19112.
15. Trambly de Laissardière, G.; Mayou, D.; Magaud, L. *Nano Lett.* **2010**, *10*, 804-808.
16. Zhang, X.; Xu, Z.; Hui, L.; Xin, J.; Ding, F. *J. Phys. Chem. Lett.* **2012**, *3*, 2822-2827.
